# Supplementary material for: Global genetic diversity and geographical distribution of Bemisia tabaci and its bacterial endosymbionts
Source: PubMed Central journal article supplement (PMC6424426; doi:10.1371/journal.pone.0213946), 2019-03-19
Supplement: pone.0213946.s004.pdf [file pone.0213946.s004.pdf]

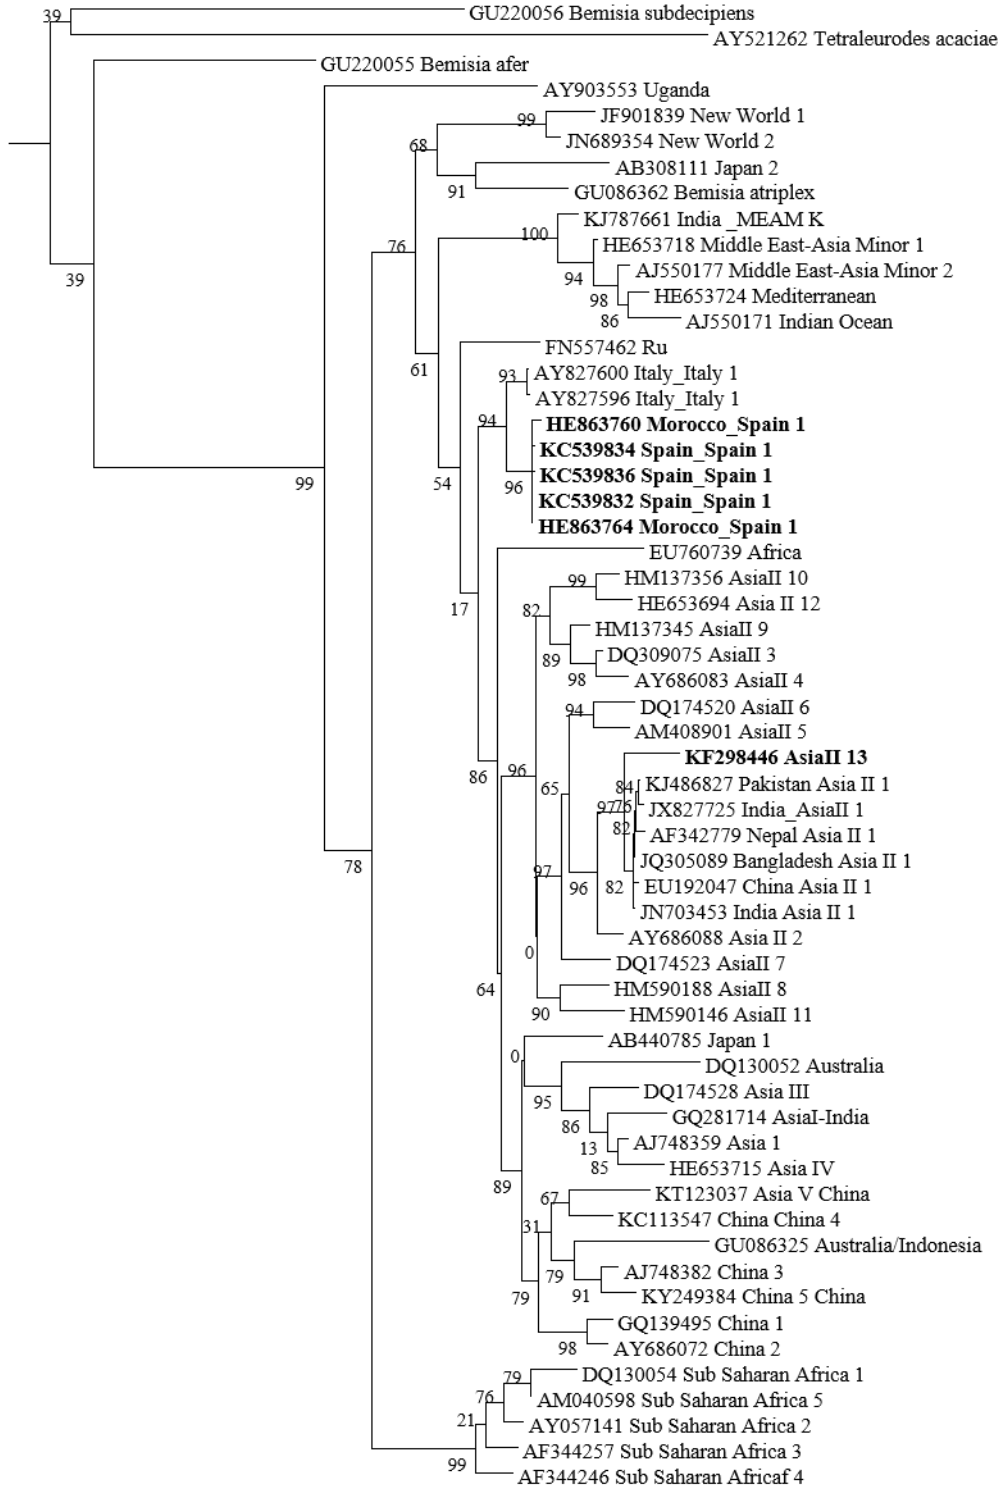

0.1
